# Supplementary material
Source: PubMed Central journal article supplement (PMC4627582)
Supplement: NIHMS62990-supplement-1.pdf [file NIHMS62990-supplement-1.pdf]

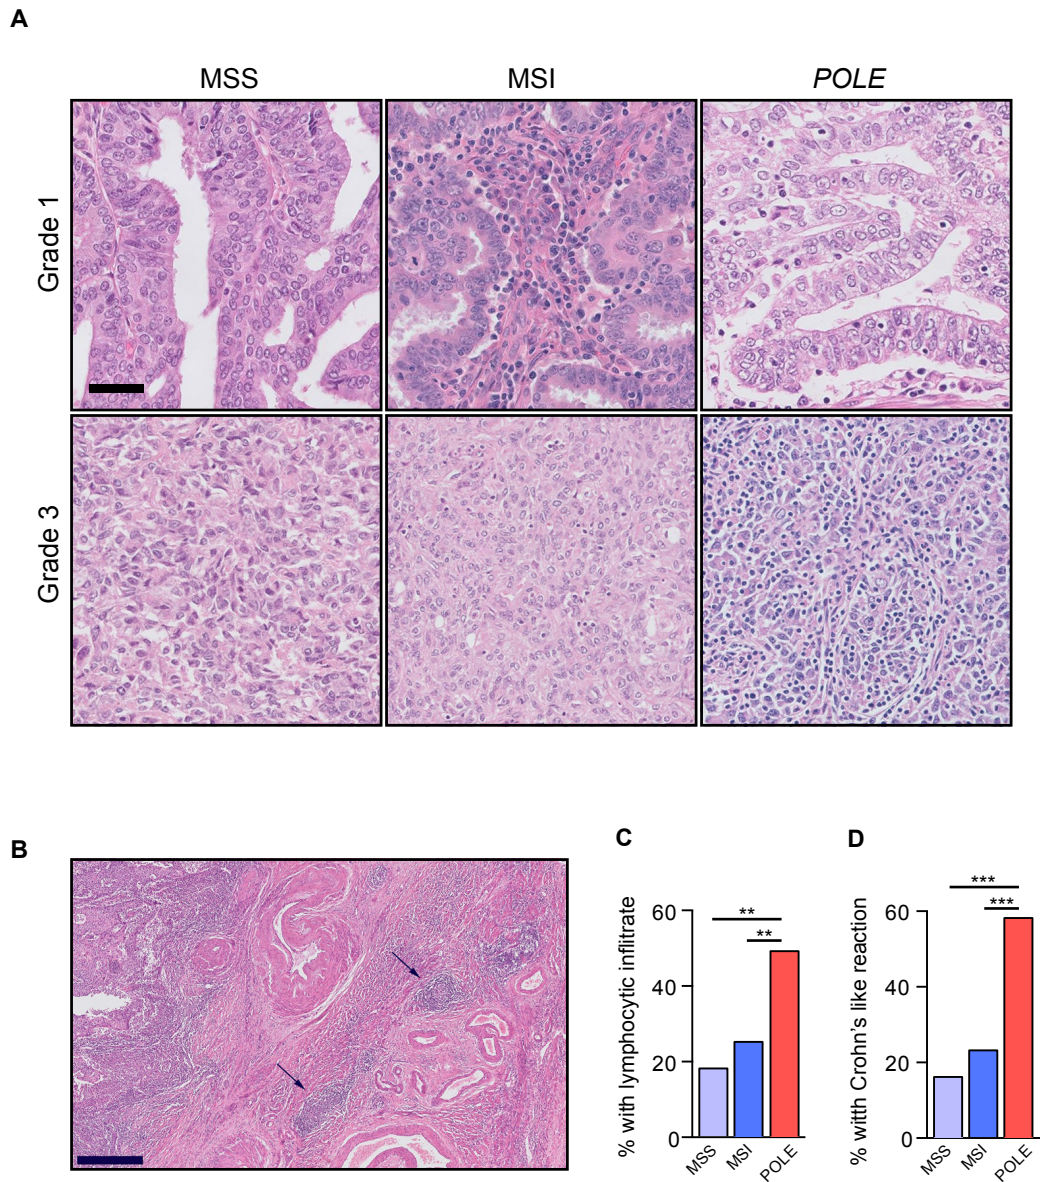

**Figure S1. Tumor infiltrating lymphocytes and Crohn's like reaction in *POLE*-mutant endometrioid endometrial cancers**

(A) Representative H&E stained sections demonstrating tumor-infiltrating lymphocytes (TILs) in *POLE* wild-type, microsatellite stable (MSS), *POLE* wild-type, microsatellite unstable (MSI) and *POLE* proofreading-mutant (*POLE*) ECs in both low and high grade tumors. Scale bar corresponds to 50 $\mu$ m. (B) Representative H&E stained section demonstrating Crohn's like reaction (indicated by arrows) in *POLE*-mutant tumor. Scale bar corresponds to 500 $\mu$ m. (C) Frequency of lymphocytic infiltrate by EC molecular subtype. (D) Frequency of Crohn's like reaction by EC molecular subtype. Comparison between groups in C and D was made by two-sided Fisher's exact test. \*\* and \*\*\* indicate  $P < 0.01$  and  $P < 0.001$  respectively.
