# Supplementary material
Source: PubMed Central journal article supplement (PMC4627582)
Supplement: NIHMS62990-supplement-2.pdf [file NIHMS62990-supplement-2.pdf]

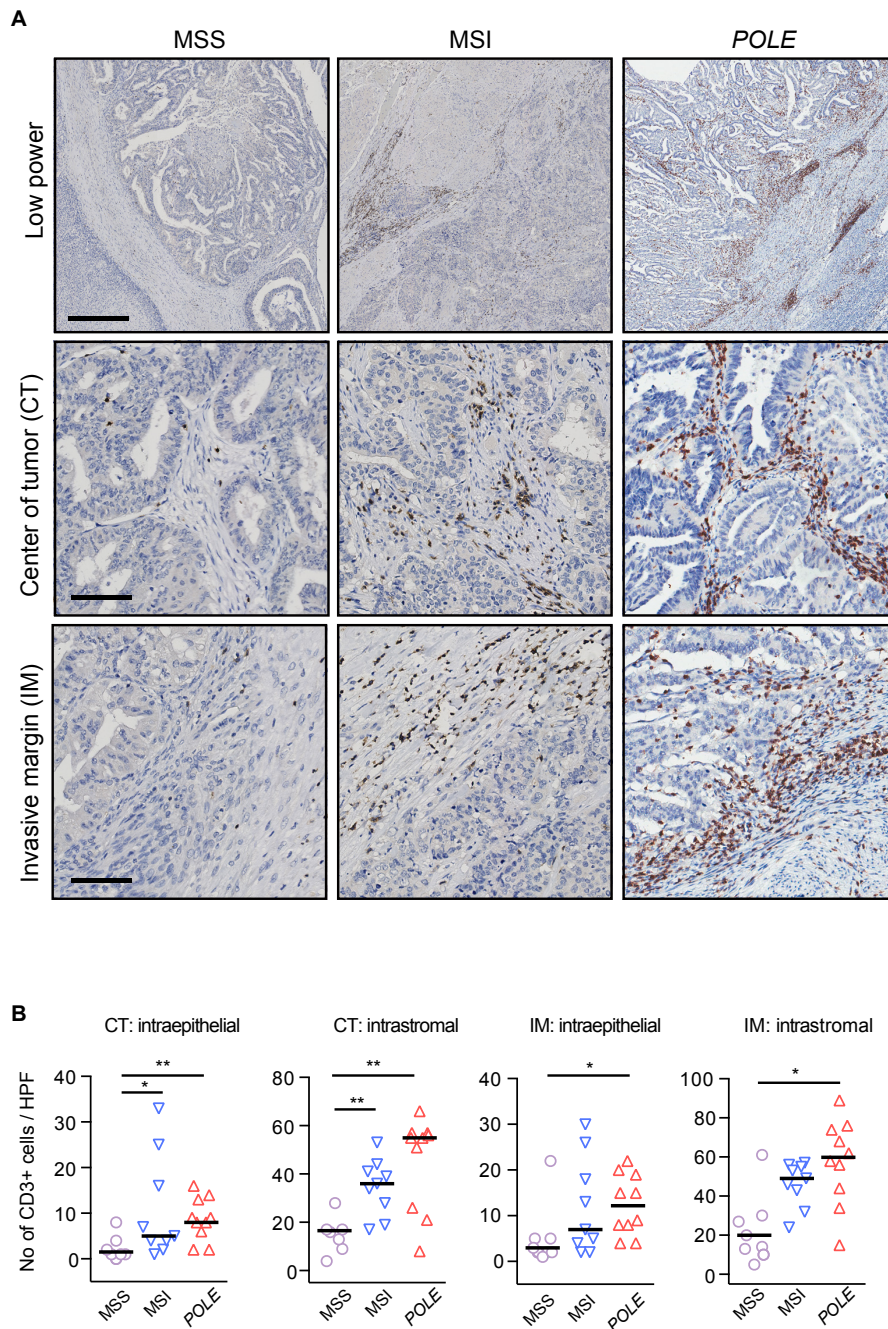

**Figure S2. CD3<sup>+</sup> tumor infiltrate according to EC molecular subtype**

(A) Representative images of CD3<sup>+</sup> staining in microsatellite stable and unstable *POLE* wild-type cancers (MSS & MSI) compared to *POLE* proofreading mutant (*POLE*) tumor at low magnification (upper panels) and high magnification in the center of the tumor (CT) and invasive margin (IM) (middle and lower panels). Scale bar in upper panel indicates 500  $\mu$ m, bar in middle and lower panels indicates 100 $\mu$ m.

(B) Quantification of CD3<sup>+</sup> cell numbers per high power (200 x 200 $\mu$ m) field in intraepithelial and intrastromal compartments within the center of the tumor (CT) and invasive margin (IM) according to EC molecular subtype. Horizontal bars indicate the median. Comparison between groups was made by unadjusted Mann-Whitney test, \* and \*\* indicate  $P < 0.05$ , and  $P < 0.01$  respectively.
