# Supplementary material
Source: PubMed Central journal article supplement (PMC4627582)
Supplement: NIHMS62990-supplement-3.pdf [file NIHMS62990-supplement-3.pdf]

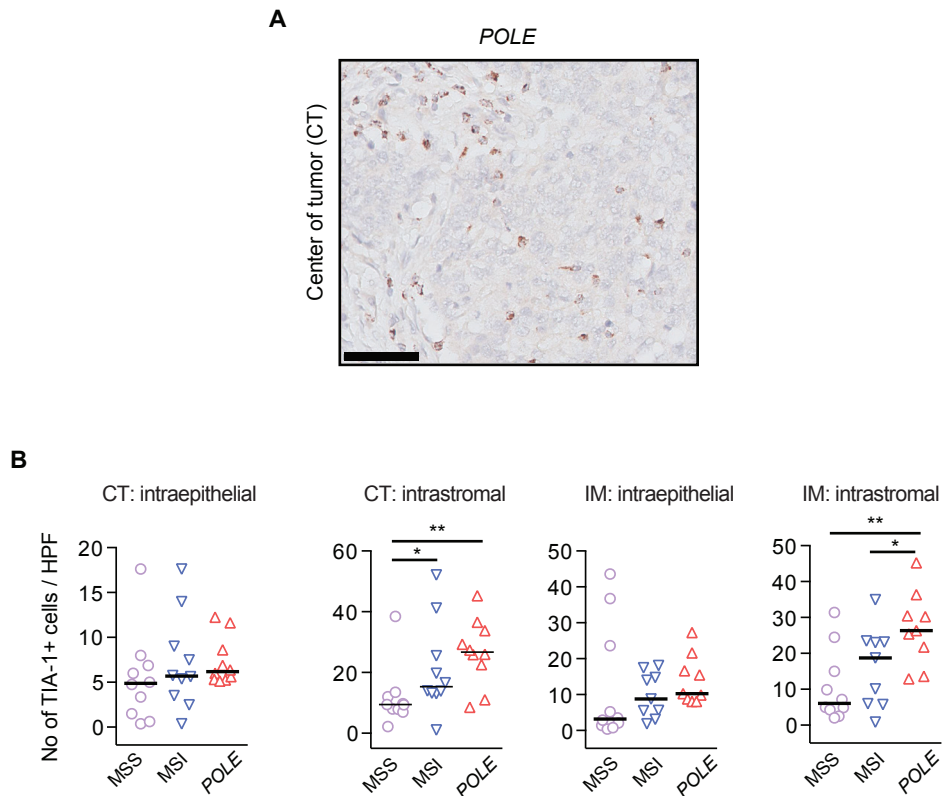

**Figure S3. Number of TIA-1<sup>+</sup> cytolytic T cells according to molecular subtype**  
**(A)** Representative high magnification image of TIA-1<sup>+</sup> staining in a *POLE* proofreading mutant (*POLE*) tumor. Scale bar indicates 50 $\mu$ m. **(B)** Quantification of TIA-1<sup>+</sup> cell numbers per high power (200 x 200 $\mu$ m) field in intraepithelial and intrastromal compartments within the center of the tumor (CT) and invasive margin (IM) for MSS, MSI and *POLE*-mutant tumors. Horizontal bars indicate the median. Comparison between groups was made by unadjusted Mann-Whitney test, \* and \*\* indicate  $P < 0.05$ , and  $P < 0.01$  respectively.
