# Supplementary material
Source: PubMed Central journal article supplement (PMC4627582)
Supplement: NIHMS62990-supplement-4.pdf [file NIHMS62990-supplement-4.pdf]

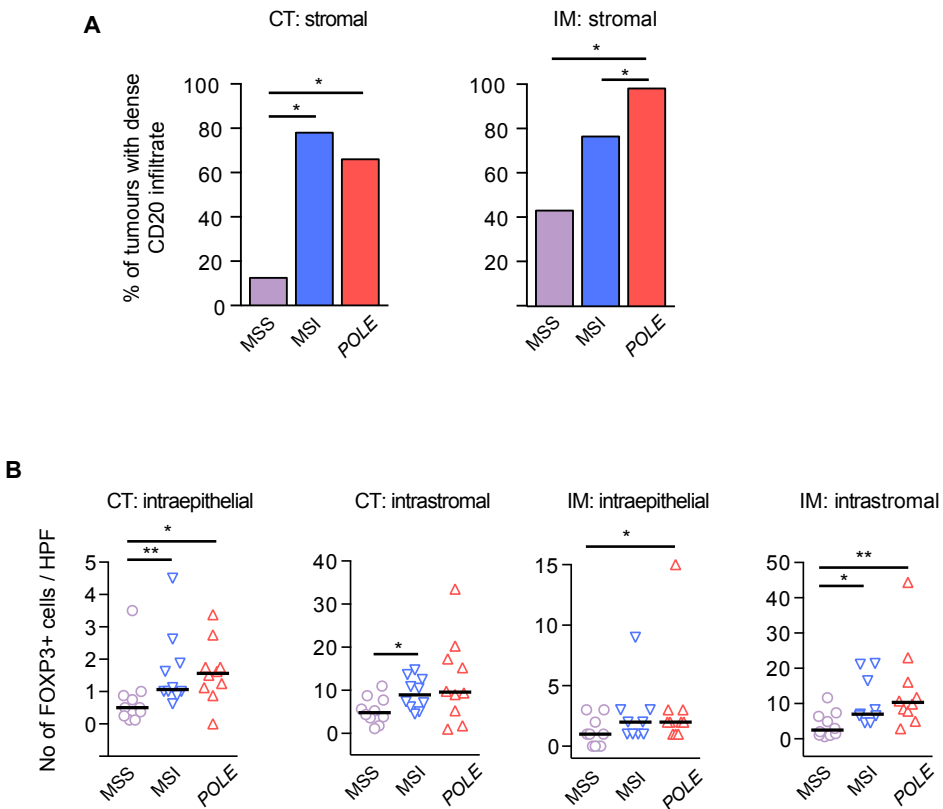

**Figure S4. CD20<sup>+</sup> and FOXP3<sup>+</sup> tumor infiltrate according to EC molecular subtype**

(A) Percentages of tumors displaying dense intrastromal CD20<sup>+</sup> infiltrate in the center of the tumor (CT) and invasive margin (IM). (B) Quantification of number of FOXP3<sup>+</sup> cells in tumor regions by EC molecular subtype. Horizontal bars indicate the median. Statistical comparisons in A and B were made by unadjusted two-sided Mann-Whitney test; \* and \*\* indicate  $P < 0.05$  and  $P < 0.01$  respectively.
