# Supplementary material
Source: PubMed Central journal article supplement (PMC4627582)
Supplement: NIHMS62990-supplement-5.pdf [file NIHMS62990-supplement-5.pdf]

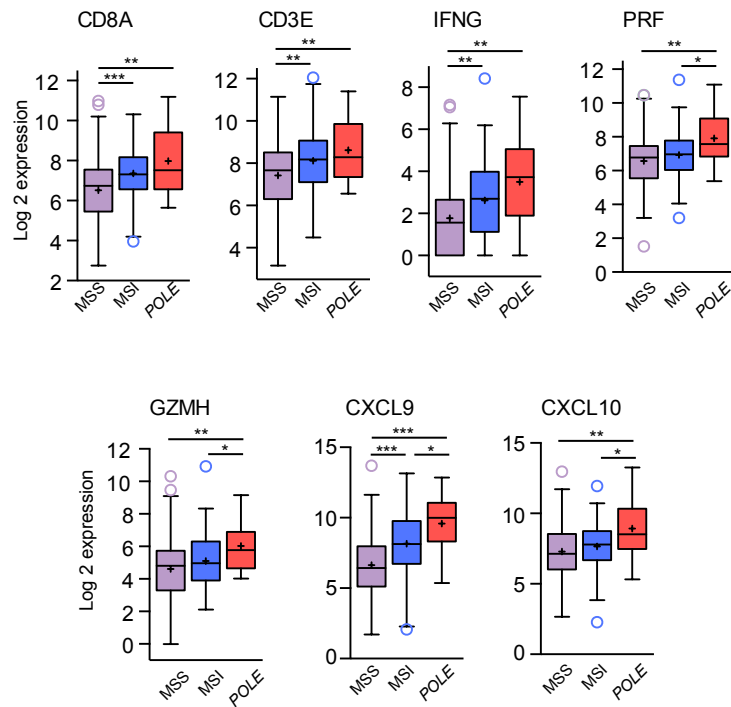

**Figure S5. Expression of T cell markers and cytotoxic effectors by EC molecular subtype**

Expression of genes encoding T cell subunits CD8 $\alpha$  (CD8A), CD3 $\epsilon$  (CD3E), cytotoxic effector molecules interferon  $\gamma$  (IFN), perforin (PRF) and granzyme H (GZMH), and IFN $\gamma$ -induced cytokines CXCL9 and CXCL10 was compared between molecular subtypes using RSEM normalized TCGA RNAseq data. Box and whiskers signify IQR  $\pm$  1.5 x IQR, mean and median as previously. Statistical comparison between groups was made by unadjusted two-sided Mann-Whitney test. \*, \*\* and \*\*\* indicate  $P < 0.05$ ,  $P < 0.01$  and  $P < 0.001$  respectively.
