# Supplementary material
Source: PubMed Central journal article supplement (PMC4627582)
Supplement: NIHMS62990-supplement-6.pdf [file NIHMS62990-supplement-6.pdf]

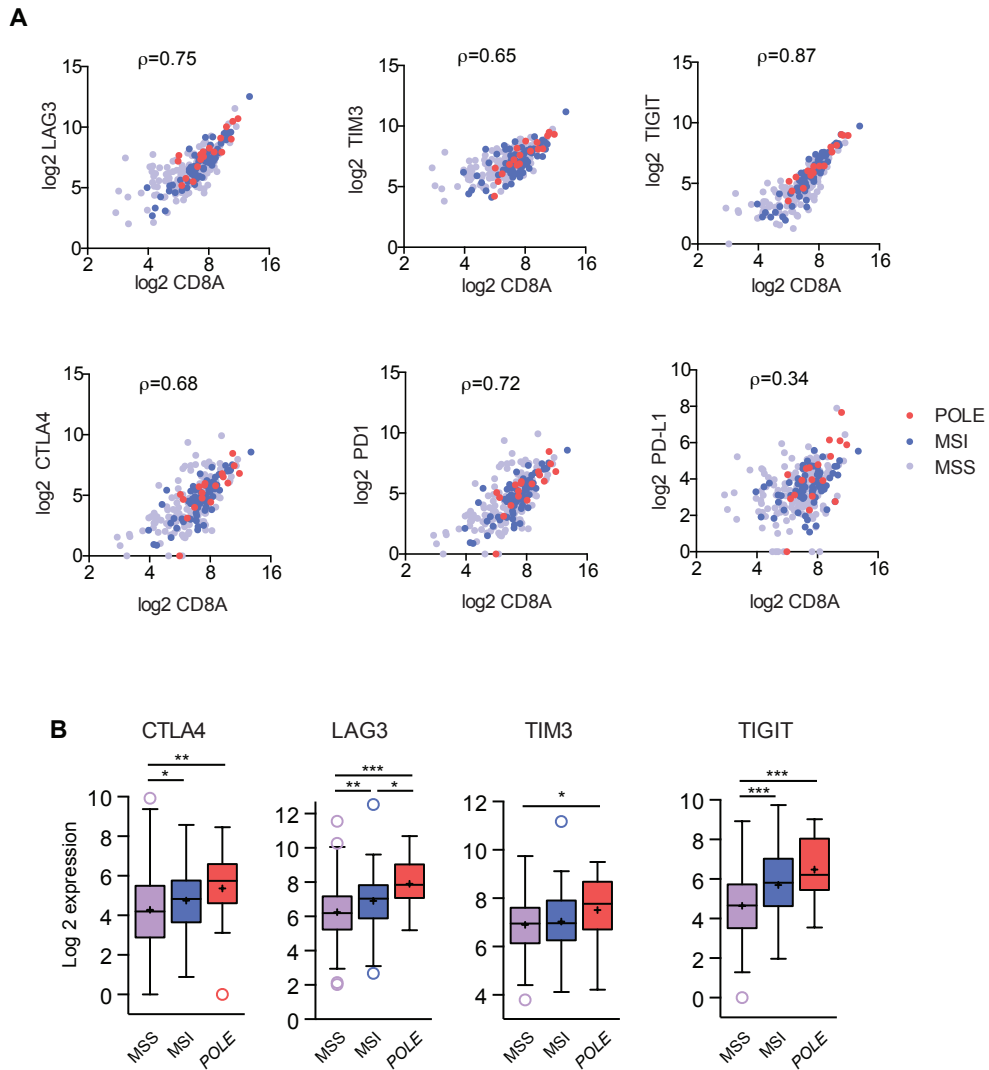

**Figure S6. T cell exhaustion markers according to tumor CD8A expression and EC molecular subtype**

(A) Correlation between CD8A expression and T cell exhaustion markers ( $P < 0.0001$ , all cases). (B) T cell exhaustion makers according to EC molecular subtype. Box and whiskers signify  $IQR \pm 1.5 \times IQR$ , mean and median as previously. Statistical comparison between groups was made by unadjusted Mann-Whitney test, \*, \*\*, and \*\*\* correspond to  $P < 0.05$ ,  $P < 0.01$ , and  $P < 0.001$  respectively.
